# Supplementary material
Source: Springer Nature journal article supplement (https://www.springermedizin.de/resource/supplementary/12903_2014_409_MOESM4_ESM.pdf/9516976)

a

C

N1

N2

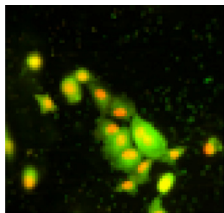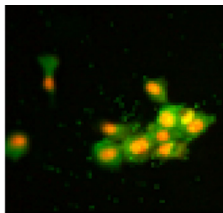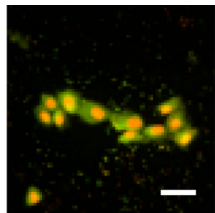

b

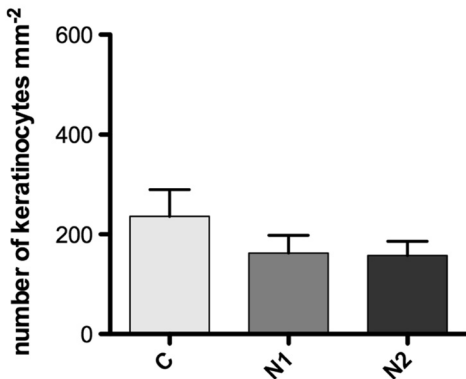

Supplement: MOESM4 [file 9516976]
